# Supplementary material for: Role of active patient involvement in undergraduate medical education: a systematic review
Source: BMJ Open. 2020 Jul 27;10(7):e037217. doi: 10.1136/bmjopen-2020-037217 (PMC7389514; doi:10.1136/bmjopen-2020-037217)
Supplement: Supplementary data [file bmjopen-2020-037217supp002.xlsx]

## Sheet: Werkblad 1
Journal characteristics				SCREENING QUESTIONS		1. QUALITATIVE STUDIES					2. RANDOMIZED CONTROLLED TRIALS					3. NON-RANDOMIZED STUDIES					4. QUANTITATIVE DESCRIPTIVE STUDIES					5. MIXED METHODS STUDIES					COMMENTS
Authors	Year of publication	Journal	Study design	S1. Are there clear research questions?	S2. Do the collected data allow to address the research questions?	1.1. Is the qualitative approach appropriate to answer the research question?	1.2. Are the qualitative data collection methods adequate to address the research question?	1.3. Are the findings adequately derived from the data?	1.4. Is the interpretation of results sufficiently substantiated by data?	1.5. Is there coherence between qualitative data sources, collection, analysis and interpretation?	2.1. Is randomization appropriately performed?	2.2. Are the groups comparable at baseline?	2.3. Are there complete outcome data?	2.4. Are outcome assessors blinded to the intervention provided?	2.5 Did the participants adhere to the assigned intervention?	3.1. Are the participants representative of the target population?	3.2. Are measurements appropriate regarding both the outcome and intervention (or exposure)?	3.3. Are there complete outcome data?	3.4. Are the confounders accounted for in the design and analysis?	3.5. During the study period, is the intervention administered (or exposure occurred) as intended?	4.1. Is the sampling strategy relevant to address the research question?	4.2. Is the sample representative of the target population?	4.3. Are the measurements appropriate?	4.4. Is the risk of nonresponse bias low?	4.5. Is the statistical analysis appropriate to answer the research question?	5.1. Is there an adequate rationale for using a mixed methods design to address the research question?	5.2. Are the different components of the study effectively integrated to answer the research question?	5.3. Are the outputs of the integration of qualitative and quantitative components adequately interpreted?	5.4. Are divergences and inconsistencies between quantitative and qualitative results adequately addressed?	5.5. Do the different components of the study adhere to the quality criteria of each tradition of the methods involved?			Number of "Yes"	Number of "Can't tell"	Number of "No"	Papers with no concerns (0) or with some concern (>0)
Rees, C.E., Knight, L.V., Wilkinson, C.E.	2006	Advances in Health Sciences Education	Qualitative description	Yes	Yes	Yes	Yes	Yes	Yes	Yes																							7	0	0	0
Ivory, K. et al.	2013	The Clinical Teacher	Case study	No	Can't tell	Can't tell	Can't tell	Can't tell	Can't tell	Can't tell																							0	0	5	5
Fritz, C. et al.	2015	Journal of Racial and Ethnic Health Disparities	Mixed methods - Exploratory design	Yes	Yes	Yes	Yes	Yes	Nyes	Yes											Yes	No	Yes	No	No	Yes	Yes	Yes	Yes	No	The effects of bias are not discussed. No statistical analysis of response data.		12	4	0	4
Bideau, M et al.	2006	Annals of the rheumatic diseases	Before and after study	Yes	Yes											Yes	Yes	Yes	No	Yes													6	1	0	1
Hatem, D.S., Gallagher, D., Frankel, R.	2003	Teaching and Learning in Medicine	Qualitative -Phenomenological design	Yes	Yes	Yes	Yes	Yes	Yes	Yes																							7	0	0	0
Barr, J. et al.	2014	The Clinical Teacher	Case study	No	Can't tell	Can't tell	Can't tell	Can't tell	Can't tell	Can't tell																							0	0	5	5
Nestel, D. et al.	2014	Advances in Medical Education and Practice	Qualitative description	Yes	Yes	Yes	Yes	Yes	Yes	Yes																							7	0	0	0
Owen, C., Reay, R.	2004	BMC Medical Education	Mixed methods - Convergent design	Yes	Yes	Yes	Yes	Yes	Yes	Yes											Yes	Yes	Yes	No	Yes	Yes	Yes	No	No	No	Negative trends in student responses are not taken into account in the qualitative analysis. Missing values, bias and confounding are not addressed.		13	4	0	4
Kamaka, M.L.	2010	Hawai'i Medical Journal	Qualitative description	Yes	Yes	Yes	Yes	Yes	Yes	Yes																							7	0	0	0
Baral, K.P., et al.	2016	Journal of Nepal Health Research Council	Case study	No	Can't tell	Can't tell	Can't tell	Can't tell	Can't tell	Can't tell																							0	0	5	5
Saketkoo, L. et al.	2004	Teaching and Learning in Medicine	Case-Control study	Yes	Yes																Yes	No	Yes	No	Yes								5	2	0	2
Noonan E.J. et al.	2018	Teaching and learning in medicine.	Qualitative - Grounded theory design	Yes	Yes	Yes	Yes	Yes	Yes	Yes																							7	0	0	0
Muir, D., Laxton, J.C.	2012	Nurse Education Today	Case study	Yes	Yes	Yes	Yes	Yes	Yes	Yes																							7	0	0	0
Hudson, G.L., Maar, M.	2014	Rural and Remote Health	Case study	No	Can't tell	Can't tell	Can't tell	Can't tell	Can't tell	Can't tell																							0	0	5	5
Cheng, P., Towle, A.	2017	Medical Teacher	Qualitative - Exploratory design	Yes	Yes	Yes	Yes	Yes	Yes	Yes																							7	0	0	0
Gaver, A. et al.	2005	Academic Medicine	Case study	No	Can't tell	Can't tell	Can't tell	Can't tell	Can't tell	Can't tell																							0	0	5	5
Bokken, L. et al.	2010	Academic Medicine	Mixed Methods - Explanatory design	Yes	Yes	Yes	Yes	Yes	Yes	Yes	Can't tell	Can't tell	No	No	Yes											Yes	Yes	Yes	Yes	No			12	3	2	5
Cooper Director, H., Spencer-Daw, E.	2006	Journal of Interprofessional Care	Case study	No	Can't tell	Can't tell	Can't tell	Can't tell	Can't tell	Can't tell																							0	0	5	5
Langlois, S., Lymer, E.	2016	Education for Health	Qualitative -Phenomenological design	Yes	Yes	Yes	Yes	Yes	Yes	Yes																							7	0	0	0
Henriksen, A., Ringsted, C.	2014	Advances in Health Sciences Education: Theory and Practice	Qualitative - Grounded theory design	Yes	Yes	Yes	Yes	Yes	Yes	Yes																							7	0	0	0
Oswald, A.E. et al.	2011 b	Medical Teacher	Case study	Yes	Yes	Yes	Yes	Yes	Yes	Yes																							7	0	0	0
Jackson, A., Blaxter, L., Lewando-Hundt, G.	2003	Medical Education	Qualitative -Phenomenological design	Yes	Yes	Yes	Yes	Yes	Yes	Yes																							7	0	0	0
Coret, A. et al.	2018	Teaching and Learning in Medicine	Mixed methods - Convergent design	Yes	Yes	Yes	Yes	Yes	Yes	Yes	Can't tell	Can't tell	Yes	Yes	Yes											Yes	Yes	No	Yes	No	No statistical analysis of difference between groups. No information comparability groups at baseline.		13	2	2	4
Lucas, B, Pearson, D.	2012	Education for Primary Care	Case study	Yes	Yes	Yes	Yes	Yes	Yes	Yes																							7	0	0	0
Oswald, A.E. et al.	2014	Medical Education	Qualitative - Grounded theory design	Yes	Yes	Yes	Yes	Yes	Yes	Yes																							7	0	0	0
Towle, A., Godolphin, W.	2013	Medical Teacher	Case study	Yes	Yes	Yes	Yes	No	No	No																							4	3	0	3
Lauckner, H., Doucet, S., Wells, S.	2012	Medical Education	Qualitative description	Yes	Yes	Yes	Yes	Yes	Yes	Yes																							7	0	0	0
Jain, S. et al.	2013	Family Medicine	Case study	No	Can't tell	Can't tell	Can't tell	Can't tell	Can't tell	Can't tell																							0	0	5	5
Lazarus, P.A.	2007	Medical Teacher	Qualitative description	Yes	Yes	Yes	Yes	Yes	No	No																							5	2	0	2
Doucet, S., Lauckner, H., Wells, S.	2013	Journal of Research in Interprofessional Practice and Education	Qualitative description	Yes	Yes	Yes	Yes	Yes	No	Yes																							6	1	0	1
O'Keefe, M., Jones, A.	2007	Medical Education	Qualitative description	Yes	Yes	Yes	Yes	Yes	No	No																							5	2	0	2
de Boer, A. et al.	2011	Clinical Rheumatology	Mixed model - convergent design	Yes	Yes	Yes	Yes	No	No	No						Yes	Yes	Yes	No	Yes						Yes	Yes	no	Yes	no			11	6	0	6
Baral, K. et al.	2016	Cureus	Case study	No	Can't tell	Can't tell	Can't tell	Can't tell	Can't tell	Can't tell																							0	0	5	5
Gutteridge, R., Dobbins, K.	2009	Nurse Education Today	Qualitative - Grounded theory design	Yes	Yes	Yes	Yes	Yes	Yes	Yes																							7	0	0	0
Dogra, N. et al.	2008	Medical Teacher	Qualitative description	Yes	Yes	Yes	Yes	Yes	Yes	Yes																							7	0	0	0
Jarvis-Selinger, S. et al.	2008	Journal of Interprofessional Care	Case study	No	Can't tell	Can't tell	Can't tell	Can't tell	Can't tell	Can't tell																							0	0	5	5
McKinlay, E, McBain, L., Gray, B.	2009	Chronic Illness	Qualitative description	Yes	Yes	Yes	No	Yes	No	No																							4	3	0	3
Humphrey-Murto, S. et al.	2004	Teaching and Learning in Medicine	Randomized controlled clinical trial	Yes	Yes						Can't tell	Can't tell	Yes	No	Yes																		4	1	2	3
Towle, A. et al.	2014	The Clinical Teacher	Case study	No	Can't tell	Can't tell	Can't tell	Can't tell	Can't tell	Can't tell																							0	0	5	5
Oswald, A.E. e.al.	2011 a	BMC Medical Education	Randomized controlled clinical trial	Yes	Yes						No	Can't tell	Yes	No	Yes																		4	2	1	3
Jaworsky, D. et al.	2017	AIDS Care	Before and after study	Yes	Yes											Yes	Yes	Yes	No	Yes													6	1	0	1
Haq, I. Fuller, J., Dacre, J.	2006	Rheumatology	Randomized controlled clinical trial	Yes	Yes						No	Can't tell	Yes	No	Yes																		4	2	1	3
Collins, L. et al.	2011	Journal of Interprofessional Care	Qualitative description	Yes	Yes	Yes	Yes	Can't tell	No	No																							4	2	1	3
Raj, N. et al.	2006	Rheumatology	Randomized controlled clinical trial	Yes	Yes						Yes	Yes	Yes	Yes	Yes																		7	0	0	0
Tierney, W.M.	2018	Journal of General Internal Medicine	Case study	No	Can't tell	Can't tell	Can't tell	Can't tell	Can't tell	Can't tell																							0	0	5	5
Duggan, A. et al.	2009	Journal of Health Communication	Qualitative - Grounded theory design	Yes	Yes	Yes	Yes	Yes	Yes	Yes																							7	0	0	0
Jha, V. et al.	2009	Medical Education	Qualitative description	Yes	Yes	Yes	Yes	Yes	Yes	Yes																							7	0	0	0
Alahlafi, A., Burge, S.	2005	British Medical Journal	Case study	No	Can't tell	Can't tell	Can't tell	Can't tell	Can't tell	Can't tell																							0	0	5	5
Stagg, P., Rosenthal, D.R.	2012	Rural and Remote Health	Qualitative description	Yes	Yes	Yes	Yes	Yes	Yes	Yes																							7	0	0	0
																																			Papers with no concern	20
			Number of items: yes	37	37	30	29	27	22	24	1	1	5	2	6	3	3	3	0	3	3	1	3	0	2	5	5	2	4	0					Papers with some concern	29
			Number of items: can't tell	0	12	12	12	13	12	12	3	5	0	0	0	0	0	0	0	0	0	0	0	0	0	0	0	0	0	0					Percentage no concern	0.408163
			Number of items: no	12	0	0	1	2	7	6	2	0	1	4	0	0	0	0	3	0	0	2	0	3	1	0	0	3	1	5
			% Yes	0.755102	0.755102	0.714286	0.690476	0.642857	0.536585	0.571429	0.166667	0.166667	0.833333	0.333333	1	1	1	1	0	1	1	0.333333	1	0	0.666667	1	1	0.4	0.8	0

## Sheet: Blad2
Study	D1	D2	D3	D4	D5	D6	D7
Rees 2006	Low	Low	Low	Low	Low	Low	Low
Ivory 2013	High	Some concerns	Some concerns	Some concerns	Some concerns	Some concerns	Some concerns
Fritz 2015	Low	Low	Low	Low	Low	Some concerns	High
Bideau 2006	Low	Low	Low	Low	Low	High	Low
